# Supplementary material
Source: PubMed Central journal article supplement (PMC2771095)

**Supplemental Figure 1 – Structure of 3-fluorotyrosine.** The fluorinated tyrosine analog used in this study differs from tyrosine in that the hydrogen ortho to the hydroxyl group has been substituted with fluorine.

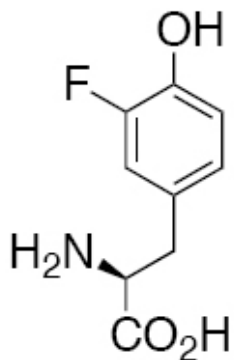

**Supplemental Figure 2 - Functional characterization of F-tyrosine-labeled proteins used in this study.** (A)  $\text{Cl}^-$  efflux from proteoliposomes (pH 5.0) was initiated with the addition of valinomycin. At the end of the experiment, Triton X-100 was added to lyse the vesicles and release all of the  $\text{Cl}^-$ . Examples of raw traces (top) and summary of unitary  $\text{Cl}^-$  turnover rates calculated from similar experiments (bottom) are shown.  $\text{Cl}^-$  flux of unlabeled wild-type CIC-ec1 at pH 5.0 is shown for comparison. All other functional experiments were performed using proteins labeled with F-tyrosine as described in “Methods.” (B)  $\text{H}^+$  pumping by F-tyr-labeled proteins was initiated by addition of valinomycin and monitored over time. At the end of the experiment, the  $\text{H}^+$  gradient was collapsed by the addition of FCCP. Top: examples of raw traces. Bottom: initial rate of  $\text{H}^+$  flux calculated from similar traces similar to those shown above. Summary data in both panels represent the mean  $\pm$  SE of at least 3 measurements.

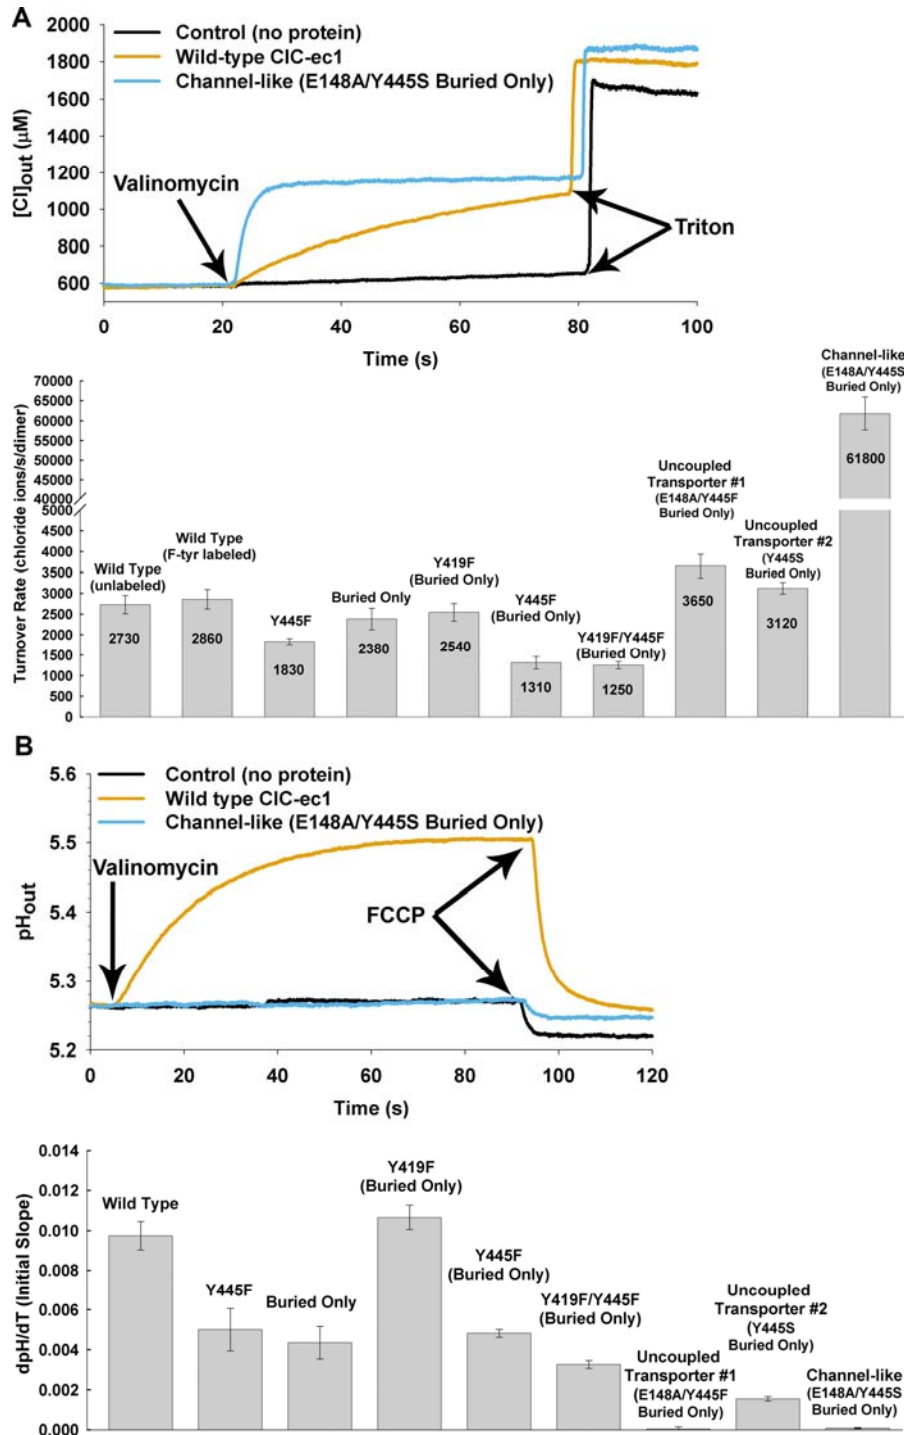

Supplement: emboj2009259s1.pdf [file emboj2009259s1.pdf]
